# Supplementary material for: Farnesoid X Receptor Deficiency Improves Glucose Homeostasis in Mouse Models of Obesity
Source: PubMed Central journal article supplement — Diabetes. 2011 Jun 20;60(7):1861–71. doi: 10.2337/db11-0030 (PMC3121443; doi:10.2337/db11-0030), 2011-06-20

**Supplementary Table 1. Primer pairs used for quantitative RT-PCR.**

| Gene              | NCBI        | Forward                  | Reverse                  |
|-------------------|-------------|--------------------------|--------------------------|
| 28S               | NR_003279.1 | AAACTCTGGTGGAGGTCCTCGT   | CTTACCAAAGTGGCCCACTA     |
| ApoC2 (apoCII)    | NM_009895.3 | CTGCTGGGCACGGTGCAGGG     | TGCTCATGGCCGCCGAGCTT     |
| ApoA5 (apoAV)     | NM_080434   | TGGCTGCAGTCATCACTTGG     | GTTCTCCTGTGCCAGCTTCTG    |
| Srebp1c (Srebp1c) | NM_11480    | ATCGGCGCGGAAGCTGTCTGGGG  | ATAGGGGGCGTCAAACAGG      |
| Acaca (Acc1)      | NM_133360   | CGACAAGTGCAGAGTGAGATTC   | CATACTGATCTGCCAAGACCTG   |
| Fasn (Fas)        | NM_007988   | CAGGCCACTATACTACCCAAGA   | ACAGGTACACTTTTCCGCTCAC   |
| Scd1              | NM_009127   | AGAAGCTGGTGATGTTCCAGAG   | CAGAGTGTATCGCAAAGAGGTG   |
| Ppara             | NM_011144   | ATCGCGTACGGCAATGGCTTTA   | CAGGCCGATCTCCACAGCAAATTA |
| Cpt1a             | NM_013495   | CATCATGACTATGCGCTACTC    | CAGTGTGTGCATGCGTTGG      |
| Acacb (Acc2)      | NM_133904   | CGACAAGTGCAGAGTGAGATTC   | CATACTGATCTGCCAAGACCTG   |
| Ucp1              | NM_009463.2 | CTGCCAGGACAGTACCCAAG     | TTTTTCAGCTGTTCAAAGCACA   |
| Dio2 (D2)         | NM_010050.2 | GAAGGGCTGCGCTGTGTCTGGA   | GCCCCATCAGCGGCTCTCTCCGA  |
| Gcg (Proglucagon) | NM_008100   | ATTGCCAAACGTCATGATGA     | GCGGACTTCTTCTGGGAAGT     |
| Pcsk1 (PC1/3)     | NM_013628   | GTGACGTGGGCTGAACAACAGTAT | TGTGTGATTCCACTCCAAGCCA   |
| ProGIP            | NM_008119   | CCTCCTGGAAGAGCTAAGAA     | TGAAAGTCCCTCTGCGTAC      |

**Supplementary Table 2. Influence of FXR-deficiency in ob/ob mice on intestinal gene expression after treatment with colestevlam.**

Ten week old FXR<sup>+/+</sup>ob/ob and FXR<sup>-/-</sup>ob/ob mice were administered 2% colestevlam mixed in the diet or plain diet for three weeks (n=13/group). Gene expression was measured by qPCR in the intestine. Values are means±SEM. Differences between genotypes or treatment groups were calculated by Mann-Whitney test (\*compares genotypes of the same treatment group; \$ compares treatment groups of the same genotype; \*or \$<0.05, \*\*<0.01).

| Gene        | FXR <sup>+/+</sup> ob/ob control | FXR <sup>+/+</sup> ob/ob treated | FXR <sup>-/-</sup> ob/ob control | FXR <sup>-/-</sup> ob/ob treated |
|-------------|----------------------------------|----------------------------------|----------------------------------|----------------------------------|
| Proglucagon | 1.00 ± 0.24                      | 1.63 ± 0.37                      | 4.23 ± 0.66**                    | 2.31 ± 0.25\$                    |
| PC1/3       | 1.00 ± 0.13                      | 2.01 ± 0.35\$                    | 1.57 ± 0.20                      | 2.18 ± 0.24                      |
| ProGIP      | 1.00 ± 0.03                      | 0.38 ± 0.04**\$                  | 0.43 ± 0.08*                     | 0.27 ± 0.03                      |

**Supplementary Figure 1. Lipidomics analysis of lipid classes in adipose tissue of FXR-deficient lean and ob/ob mice.** Lipidomics analysis was performed in white adipose tissue of six week old FXR<sup>+/+</sup>ob/ob (white bars), FXR<sup>-/-</sup>ob/ob mice (black bars) as well as lean FXR<sup>+/+</sup> and FXR<sup>-/-</sup> littermates. Content of **A.** total phospholipids, **B.** total sphingomyelins and **C.** total triglycerides. Values are means±SEM. Differences between genotypes were calculated by 1way-ANOVA and Student’s t-test (\*compares the effect of leptin-deficiency; \*\*\*<0.001).

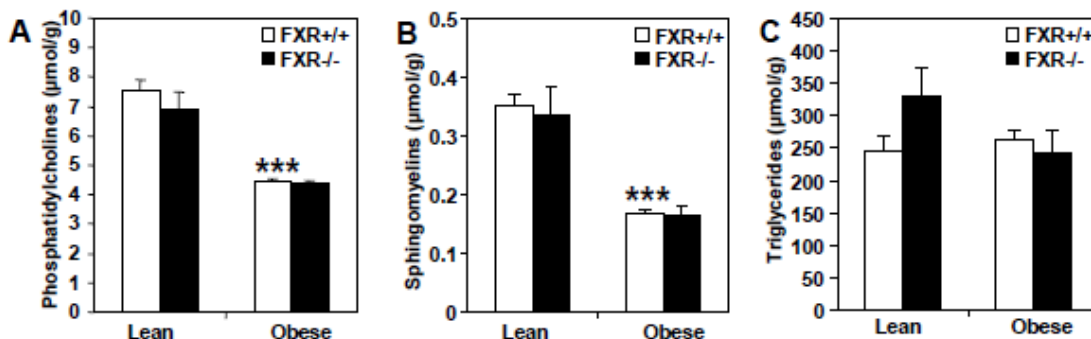

Supplement: supp_db11-0030_DB110030SupplementaryData.pdf [file supp_db11-0030_DB110030SupplementaryData.pdf]
